# Supplementary material
Source: Royal Society of Chemistry journal article supplement (doi:10.1039/d6su00221h)
Supplement: d6su00221h2.pdf [file d6su00221h2.pdf]

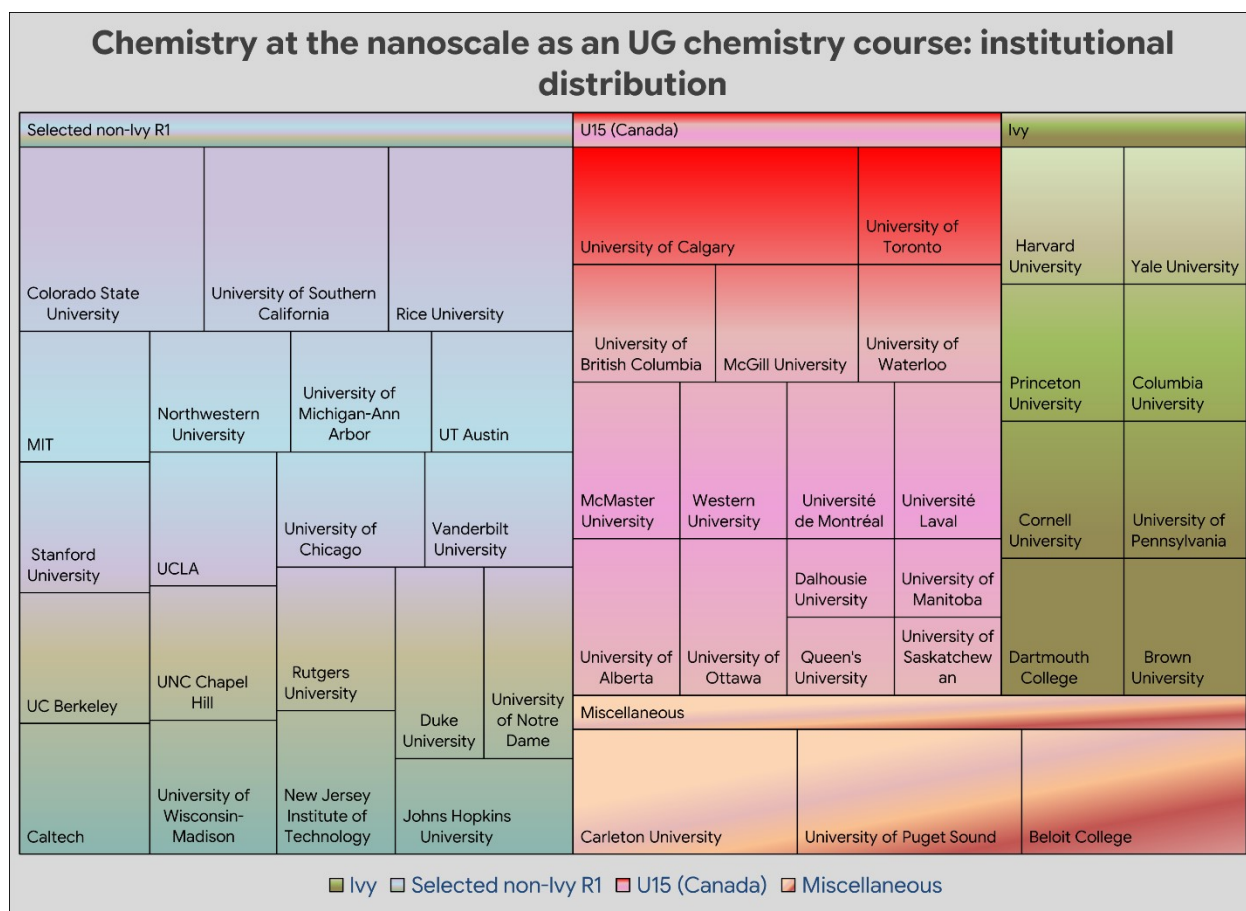

Figure S1

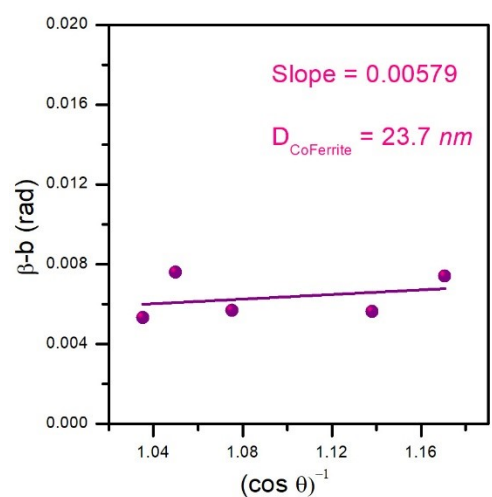

Figure S2

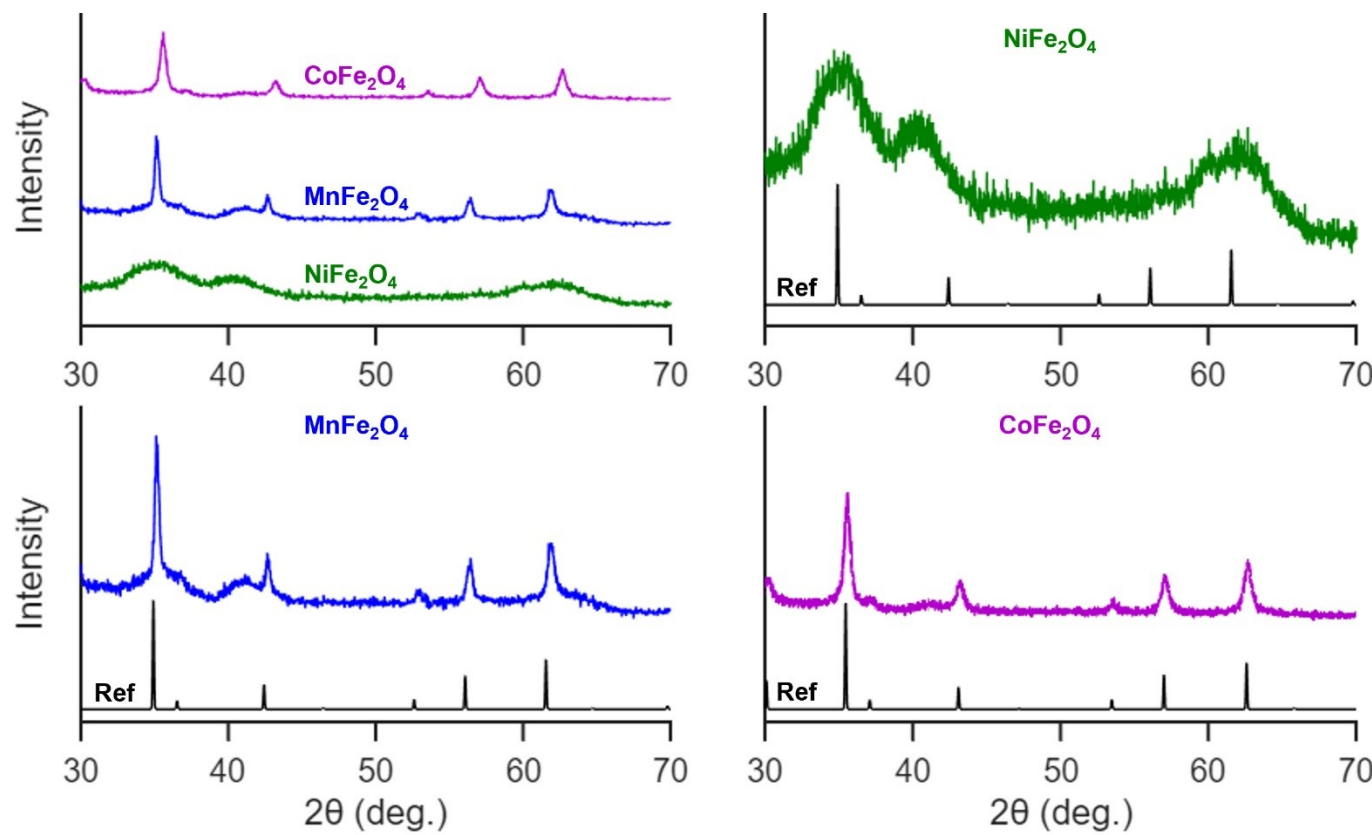

Figure S3

## CoFe<sub>2</sub>O<sub>4</sub>

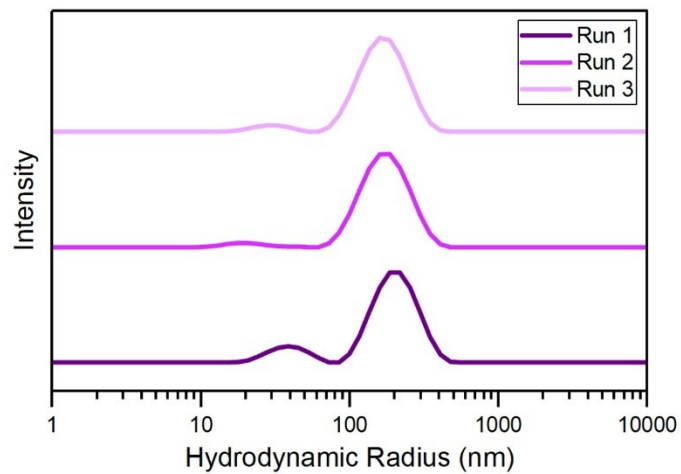

## NiFe<sub>2</sub>O<sub>4</sub>

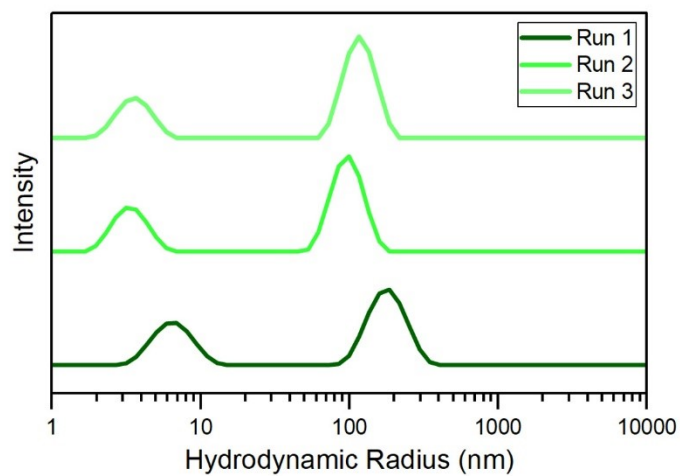

Figure S4

| Segment     | LLM Prompt                                                                                                                                                                                          | AI Claim/Output                                                                                                                                                                                         | Validation Source                                                                                                                                                                                                                                                                                            | Result/Reflection                                                                                                                          |
|-------------|-----------------------------------------------------------------------------------------------------------------------------------------------------------------------------------------------------|---------------------------------------------------------------------------------------------------------------------------------------------------------------------------------------------------------|--------------------------------------------------------------------------------------------------------------------------------------------------------------------------------------------------------------------------------------------------------------------------------------------------------------|--------------------------------------------------------------------------------------------------------------------------------------------|
| Synthesis   | Why do we obtain amorphous NiFe <sub>2</sub> O <sub>4</sub> NPs, while the other ferrites show crystallinity? Is there a way to increase the crystallinity of NiFe <sub>2</sub> O <sub>4</sub> NPs? | Nickel ferrite often needs higher thermal energy or longer aging to crystallize than manganese and cobalt ferrites; heating in a furnace at high temperatures (>450°C) can help increase crystallinity. | Cherpin <i>et al.</i> , <i>Materials</i> , <b>2021</b> , <i>14</i> (10), 2557.<br><a href="https://doi.org/10.3390/ma14102557">https://doi.org/10.3390/ma14102557</a>                                                                                                                                        | <b>Verified:</b> Crucial for understanding the diffractogram of NiFe <sub>2</sub> O <sub>4</sub> NPs and catalytic performance comparison. |
| PXRD        | Which is a common PXRD peak for all these ferrites?                                                                                                                                                 | The peak at 2θ=35.4°; Miller index <b>(311)</b>                                                                                                                                                         | COD Database / Mercury™                                                                                                                                                                                                                                                                                      | <b>Verified:</b> Matched experimental diffractogram peak at ~35°.                                                                          |
| Application | Suggest two ways in which the MMFNP catalyzed Fenton-like oxidation of dyes in wastewater may be implemented at scale in a real-life scenario.                                                      | An industrial water treatment plant would use a reactor exposed to sunlight when possible, with back-up industrial UV-LEDs. The reaction would be done under continuous flow conditions.                | This paper demonstrates a continuous 65-day operation in a secondary effluent plant, calculating a cost of <b>USD per ton</b> of water.<br><br>Wang <i>et al.</i> , <i>Appl. Sci.</i> <b>2025</b> , <i>15</i> , 8210.<br><a href="https://doi.org/10.3390/ap15158210">https://doi.org/10.3390/ap15158210</a> | <b>Inconclusive:</b> No way to implement these recommendations within a teaching laboratory setup.                                         |

Figure S5

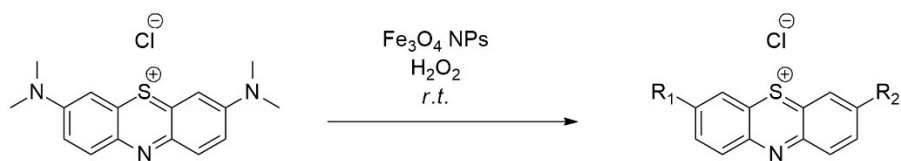

**Thionine:**  $\text{R}_1 = \text{R}_2 = -\text{NH}_2$   
**Azure C:**  $\text{R}_1 = -\text{NHMe}$ ;  $\text{R}_2 = -\text{NH}_2$   
**Azure A:**  $\text{R}_1 = -\text{NMe}_2$ ;  $\text{R}_2 = -\text{NH}_2$   
**Azure B:**  $\text{R}_1 = -\text{NHMe}$ ;  $\text{R}_2 = -\text{NMe}_2$   
 $\text{R}_1 = -\text{NH}_2$ ;  $\text{R}_2 = -\text{OH}$   
 $\text{R}_1 = -\text{NHMe}$ ;  $\text{R}_2 = -\text{OH}$   
 $\text{R}_1 = \text{R}_2 = -\text{NHMe}$   
 $\text{R}_1 = -\text{NMe}_2$ ;  $\text{R}_2 = -\text{OH}$   
 $\text{R}_1 = \text{R}_2 = -\text{OH}$   
 $\text{R}_1 = -\text{N}(\text{CHO})_2$ ;  $-\text{R}_2 = =\text{NH}_2^+$   
 $\text{R}_1 = -\text{NH}(\text{CHO})$ ;  $-\text{R}_2 = =\text{NH}_2^+$   
 $\text{R}_1 = -\text{N}(\text{CH}_2\text{OH})(\text{CHO})$ ;  $-\text{R}_2 = =\text{NH}_2^+$

Figure S6
